# Supplementary material for: Cinnamomum verum J. Presl Bark Contains High Contents of Nicotinamide Mononucleotide
Source: Molecules. 2022 Oct 19;27(20):7054. doi: 10.3390/molecules27207054 (PMC9612253; doi:10.3390/molecules27207054)
Supplement: Supplementary file 1 [file molecules-27-07054-s001.zip]

Archive with 6 entries (6 files):
- 220929_Supplementary Materials.pdf
- S1 (1).jpg
- S2.jpg
- S3.jpg
- S4 (2).jpg
- S5 (1).jpg
